# Supplementary material for: Virus–Host Protein–Protein Interactions between Human Papillomavirus 16 E6 A1 and D2/D3 Sub-Lineages: Variances and Similarities
Source: MDPI journal article supplement (doi:10.3390/ijms21217980), 2020-10-27
Supplement: s1 [file s1]

**Table A – Reactome analysis of the AAE6 interactors selected with the Protein-Pathway method. The pathways with a significant FDR (<0.05) are bolded**

| Pathway name                                                        | Entities found | Entities p-value | Entities FDR | UniProt number                                           | Entities protein name                                                                                                                                                                                                                                                                              |
|---------------------------------------------------------------------|----------------|------------------|--------------|----------------------------------------------------------|----------------------------------------------------------------------------------------------------------------------------------------------------------------------------------------------------------------------------------------------------------------------------------------------------|
| <b>(1) Loss of Function of FBXW7 in Cancer and NOTCH1 Signaling</b> | 3/6            | 3.31E-05         | 0.012        | P62877<br>Q969H0-1<br>Q969H0-4                           | E3 ubiquitin-protein ligase <i>RBX1</i><br>F-box/WD repeat-containing protein 7 <i>FBXW7</i> isoform 1<br>F-box/WD repeat-containing protein 7 <i>FBXW7</i> isoform 4                                                                                                                              |
| <b>(2) FBXW7 Mutants and NOTCH1 in Cancer</b>                       | 3/6            | 3.31E-05         | 0.012        | P62877<br>Q969H0-1<br>Q969H0-4                           | E3 ubiquitin-protein ligase <i>RBX1</i><br>F-box/WD repeat-containing protein 7 <i>FBXW7</i> isoform 1<br>F-box/WD repeat-containing protein 7 <i>FBXW7</i> isoform 4                                                                                                                              |
| <b>(3) NOTCH1 Intracellular Domain Regulates Transcription</b>      | 5/48           | 1.30E-04         | 0.019        | P49336<br>P62877<br>Q969H0-1<br>Q969H0-4<br>Q92830       | Cyclin-dependent kinase 8 <i>CDK8</i><br>E3 ubiquitin-protein ligase <i>RBX1</i><br>F-box/WD repeat-containing protein 7 <i>FBXW7</i> isoform 1<br>F-box/WD repeat-containing protein 7 <i>FBXW7</i> isoform 4<br>Histone acetyltransferase <i>KAT2A</i>                                           |
| <b>(4) Regulation of TP53 Expression</b>                            | 2/2            | 1.94E-04         | 0.019        | P04637<br>O75626                                         | Cellular tumour antigen <i>P53</i><br>PR domain zinc finger protein 1 <i>PRDM1</i>                                                                                                                                                                                                                 |
| <b>(5) Defective Base Excision Repair Associated with MUTYH</b>     | 2/2            | 1.94E-04         | 0.019        | Q9UIF7-3<br>Q9UIF7-6                                     | Adenine DNA glycosylase <i>MUTYH</i> isoform 3<br>Adenine DNA glycosylase <i>MUTYH</i> isoform 6                                                                                                                                                                                                   |
| <b>(6) Pyrophosphate hydrolysis</b>                                 | 2/2            | 1.94E-04         | 0.019        | Q9H2U2<br>Q15181                                         | Inorganic pyrophosphatase 2, mitochondrial <i>IPYR2</i><br>Inorganic pyrophosphatase <i>IPYR</i>                                                                                                                                                                                                   |
| <b>(7) Defective MUTYH substrate processing</b>                     | 2/2            | 1.94E-04         | 0.019        | Q9UIF7-3<br>Q9UIF7-6                                     | Adenine DNA glycosylase <i>MUTYH</i> isoform 3<br>Adenine DNA glycosylase <i>MUTYH</i> isoform 6                                                                                                                                                                                                   |
| <b>(8) TP53 Regulates Metabolic Genes</b>                           | 6/88           | 2.70E-04         | 0.019        | P42345<br>Q9UGJ0<br>P04637<br>P14854<br>P10599<br>Q9HCJ0 | Serine/threonine-protein kinase mTOR <i>MTOR</i><br>5'-AMP-activated protein kinase subunit gamma-2 <i>AAKG2</i><br>Cellular tumour antigen <i>P53</i><br>Cytochrome c oxidase subunit 6B1 <i>CX6B1</i><br>Thioredoxin <i>THIO</i><br>Trinucleotide repeat-containing gene 6C protein <i>TNR6C</i> |
| <b>(9) Constitutive Signaling by NOTCH1 HD+PEST Domain Mutants</b>  | 5/59           | 3.34E-04         | 0.019        | P49336<br>P62877<br>Q969H0-1<br>Q969H0-4<br>Q92830       | Cyclin-dependent kinase 8 <i>CDK8</i><br>E3 ubiquitin-protein ligase <i>RBX1</i><br>F-box/WD repeat-containing protein 7 <i>FBXW7</i> isoform 1<br>F-box/WD repeat-containing protein 7 <i>FBXW7</i> isoform 4<br>Histone acetyltransferase <i>KAT2A</i>                                           |

| Pathway name                                                     | Entities found | Entities p-value | Entities FDR | UniProt number                                                                                   | Entities protein name                                                                                                                                                                                                                                                                                                                                                                                                                                                                                                   |
|------------------------------------------------------------------|----------------|------------------|--------------|--------------------------------------------------------------------------------------------------|-------------------------------------------------------------------------------------------------------------------------------------------------------------------------------------------------------------------------------------------------------------------------------------------------------------------------------------------------------------------------------------------------------------------------------------------------------------------------------------------------------------------------|
| <b>(10) Signaling by NOTCH1 HD+PEST Domain Mutants in Cancer</b> | 5/59           | 3.34E-04         | 0.019        | P49336<br>P62877<br>Q969H0-1<br>Q969H0-4<br>Q92830                                               | Cyclin-dependent kinase 8 <i>CDK8</i><br>E3 ubiquitin-protein ligase <i>RBX1</i><br>F-box/WD repeat-containing protein 7 <i>FBXW7</i> isoform 1<br>F-box/WD repeat-containing protein 7 <i>FBXW7</i> isoform 4<br>Histone acetyltransferase <i>KAT2A</i>                                                                                                                                                                                                                                                                |
| <b>(11) Signaling by NOTCH1 PEST Domain Mutants in Cancer</b>    | 5/59           | 3.34E-04         | 0.019        | P49336<br>P62877<br>Q969H0-1<br>Q969H0-4<br>Q92830                                               | Cyclin-dependent kinase 8 <i>CDK8</i><br>E3 ubiquitin-protein ligase <i>RBX1</i><br>F-box/WD repeat-containing protein 7 <i>FBXW7</i> isoform 1<br>F-box/WD repeat-containing protein 7 <i>FBXW7</i> isoform 4<br>Histone acetyltransferase <i>KAT2A</i>                                                                                                                                                                                                                                                                |
| <b>(12) Constitutive Signaling by NOTCH1 PEST Domain Mutants</b> | 5/59           | 3.34E-04         | 0.019        | P49336<br>P62877<br>Q969H0-1<br>Q969H0-4<br>Q92830                                               | Cyclin-dependent kinase 8 <i>CDK8</i><br>E3 ubiquitin-protein ligase <i>RBX1</i><br>F-box/WD repeat-containing protein 7 <i>FBXW7</i> isoform 1<br>F-box/WD repeat-containing protein 7 <i>FBXW7</i> isoform 4<br>Histone acetyltransferase <i>KAT2A</i>                                                                                                                                                                                                                                                                |
| <b>(13) Signaling by NOTCH1 in Cancer</b>                        | 5/59           | 3.34E-04         | 0.019        | P49336<br>P62877<br>Q969H0-1<br>Q969H0-4<br>Q92830                                               | Cyclin-dependent kinase 8 <i>CDK8</i><br>E3 ubiquitin-protein ligase <i>RBX1</i><br>F-box/WD repeat-containing protein 7 <i>FBXW7</i> isoform 1<br>F-box/WD repeat-containing protein 7 <i>FBXW7</i> isoform 4<br>Histone acetyltransferase <i>KAT2A</i>                                                                                                                                                                                                                                                                |
| <b>(14) Signaling by WNT</b>                                     | 10/299         | 8.48E-04         | 0.044        | P25054<br>Q13237<br>P09497<br>P62877<br>P56545<br>Q9P219<br>P35913<br>Q8N474<br>O14641<br>Q9HCJ0 | Adenomatous polyposis coli protein <i>APC</i><br>cGMP-dependent protein kinase 2 <i>KGP2</i><br>Clathrin light chain B <i>CLCB</i><br>E3 ubiquitin-protein ligase <i>RBX1</i><br>PC-terminal-binding protein 2 <i>CTBP2</i><br>Protein Daple <i>DAPLE</i><br>Rod cGMP-specific 3',5'-cyclic phosphodiesterase subunit beta <i>PDE6B</i><br>Secreted frizzled-related protein 1 <i>SFRP1</i><br>Segment polarity protein dishevelled homolog <i>DVL2</i><br>Trinucleotide repeat-containing gene 6C protein <i>TNR6C</i> |

| Pathway name                                                                    | Entities found | Entities p-value | Entities FDR | UniProt number                                                                   | Entities protein name                                                                                                                                                                                                                                                                                                                                                                                    |
|---------------------------------------------------------------------------------|----------------|------------------|--------------|----------------------------------------------------------------------------------|----------------------------------------------------------------------------------------------------------------------------------------------------------------------------------------------------------------------------------------------------------------------------------------------------------------------------------------------------------------------------------------------------------|
| (15) Signaling by NOTCH1                                                        | 5/74           | 9.23E-04         | 0.045        | P49336<br>P62877<br>Q969H0-1<br>Q969H0-4<br>Q92830                               | Cyclin-dependent kinase 8 <i>CDK8</i><br>E3 ubiquitin-protein ligase <i>RBX1</i><br>F-box/WD repeat-containing protein 7 <i>FBXW7</i> isoform 1<br>F-box/WD repeat-containing protein 7 <i>FBXW7</i> isoform 4<br>Histone acetyltransferase <i>KAT2A</i>                                                                                                                                                 |
| (16) Signaling by NOTCH                                                         | 8/205          | 0.0011           | 0.049        | P04637<br>P49336<br>P62877<br>Q969H0-1<br>Q969H0-4<br>Q92830<br>Q14186<br>Q9HCJ0 | Cellular tumour antigen <i>P53</i><br>Cyclin-dependent kinase 8 <i>CDK8</i><br>E3 ubiquitin-protein ligase <i>RBX1</i><br>F-box/WD repeat-containing protein 7 <i>FBXW7</i> isoform 1<br>F-box/WD repeat-containing protein 7 <i>FBXW7</i> isoform 4<br>Histone acetyltransferase <i>KAT2A</i><br>Transcription factor Dp-1 <i>TFDP1</i><br>Trinucleotide repeat-containing gene 6C protein <i>TNR6C</i> |
| (17) Negative regulation of TCF-dependent signaling by DVL-interacting proteins | 2/5            | 0.0012           | 0.049        | Q9P219<br>O14641                                                                 | Protein Daple <i>DAPLE</i><br>Segment polarity protein dishevelled homolog <i>DVL2</i>                                                                                                                                                                                                                                                                                                                   |
| (18) Activation of NOXA and translocation to mitochondria                       | 2/5            | 0.0012           | 0.049        | P04637<br>Q14186                                                                 | Cellular tumour antigen <i>P53</i><br>Transcription factor Dp-1 <i>TFDP1</i>                                                                                                                                                                                                                                                                                                                             |
| (19) Diseases of Base Excision Repair                                           | 2/7            | 0.0023           | 0.087        | Q9UIF7-3<br>Q9UIF7-6                                                             | Adenine DNA glycosylase <i>MUTYH</i> isoform 3<br>Adenine DNA glycosylase <i>MUTYH</i> isoform 6                                                                                                                                                                                                                                                                                                         |
| (20) Insulin processing                                                         | 3/27           | 0.0026           | 0.091        | P16870<br>Q12840<br>P33176                                                       | Carboxypeptidase E <i>CBPE</i><br>Kinesin heavy chain isoform 5A <i>KIF5A</i><br>Kinesin-1 heavy chain <i>KINH</i>                                                                                                                                                                                                                                                                                       |
| (21) Oxidative Stress Induced Senescence                                        | 5/94           | 0.0026           | 0.091        | P04637<br>P01100<br>P10599<br>Q14186<br>Q9HCJ0                                   | Cellular tumour antigen <i>P53</i><br>Proto-oncogene c-Fos <i>FOS</i><br>Thioredoxin <i>THIO</i><br>Transcription factor Dp-1 <i>TFDP1</i><br>Trinucleotide repeat-containing gene 6C protein <i>TNR6C</i>                                                                                                                                                                                               |
| (22) Pre-NOTCH Transcription and Translation                                    | 4/62           | 0.0036           | 0.113        | P04637<br>Q92830<br>Q14186<br>Q9HCJ0                                             | Cellular tumour antigen <i>P53</i><br>Histone acetyltransferase <i>KAT2A</i><br>Transcription factor Dp-1 <i>TFDP1</i><br>Trinucleotide repeat-containing gene 6C protein <i>TNR6C</i>                                                                                                                                                                                                                   |

| Pathway name                                              | Entities found | Entities p-value | Entities FDR | UniProt number                                                                                   | Entities protein name                                                                                                                                                                                                                                                                                                                                                                                                                                       |
|-----------------------------------------------------------|----------------|------------------|--------------|--------------------------------------------------------------------------------------------------|-------------------------------------------------------------------------------------------------------------------------------------------------------------------------------------------------------------------------------------------------------------------------------------------------------------------------------------------------------------------------------------------------------------------------------------------------------------|
| (23) Activation of PUMA and translocation to mitochondria | 2/9            | 0.0038           | 0.113        | P04637<br>Q14186                                                                                 | Cellular tumour antigen <i>P53</i><br>Transcription factor Dp-1 <i>TFDP1</i>                                                                                                                                                                                                                                                                                                                                                                                |
| (24) Transcriptional Regulation by TP53                   | 10/367         | 0.0038           | 0.113        | Q9UGJ0<br>Q92851<br>P04637<br>P14854<br>O75626<br>P01100<br>P42345<br>P10599<br>Q14186<br>Q9HCJ0 | 5'-AMP-activated protein kinase subunit gamma-2 <i>AAKG2</i><br>Caspase-10 <i>CASP10</i><br>Cellular tumour antigen <i>p53</i><br>Cytochrome c oxidase subunit 6B1 <i>CX6B1</i><br>PR domain zinc finger protein 1 <i>PRDM1</i><br>Proto-oncogene c-Fos <i>FOS</i><br>Serine/threonine-protein kinase mTOR <i>MTOR</i><br>Thioredoxin <i>THIO</i><br>Transcription factor Dp-1 <i>TFDP1</i><br>Trinucleotide repeat-containing gene 6C protein <i>TNR6C</i> |
| (25) FOXO-mediated transcription                          | 4/66           | 0.0045           | 0.124        | Q8N139<br>Q969P5<br>P23511<br>P10599                                                             | ATP-binding cassette sub-family A member 6 <i>ABCA6</i><br>F-box only protein 32 <i>FBX32</i><br>Nuclear transcription factor Y subunit alpha <i>NFYA</i><br>Thioredoxin <i>THIO</i>                                                                                                                                                                                                                                                                        |

**Table B – Reactome analysis of the EPE6 interactors selected with the Protein-Pathway method**

| Pathway name                                                         | Entities found | Entities p-value | Entities FDR | UniProt number                       | Entities protein name                                                                                                                                                                                   |
|----------------------------------------------------------------------|----------------|------------------|--------------|--------------------------------------|---------------------------------------------------------------------------------------------------------------------------------------------------------------------------------------------------------|
| (1) Signaling by Hippo                                               | 3/20           | 4.21E-04         | 0.144        | O14641<br>Q9UDY2<br>Q9GZV5           | Segment polarity protein disheveled homolog <i>DVL-2</i><br>Tight junction protein <i>ZO-2</i><br>WW domain-containing transcription regulator protein 1 <i>WWTR1</i>                                   |
| (2) Post-chaperonin tubulin folding pathway                          | 3/23           | 6.31E-04         | 0.144        | Q13509<br>O75347<br>Q9BTW9           | Tubulin beta-3 chain <i>TUBB3</i><br>Tubulin-specific chaperone A <i>TBCA</i><br>Tubulin-specific chaperone D <i>TBCD</i>                                                                               |
| (3) Activated NTRK3 signals through PI3K                             | 2/6            | 8.81E-04         | 0.144        | P35568<br>P27986                     | Insulin receptor substrate 1 <i>IRS1</i><br>Phosphatidylinositol 3-kinase regulatory subunit alpha <i>PIK3R1</i>                                                                                        |
| (4) RNA Polymerase III Transcription Initiation from Type 3 Promoter | 3/28           | 0.0011           | 0.144        | Q16533<br>Q5SXM2<br>A6H8Y1           | snRNA-activating protein complex subunit 1 <i>SNAPC1</i><br>snRNA-activating protein complex subunit 4 <i>SNAPC4</i><br>Transcription factor TFIIIB component B'' homolog <i>BDP1</i>                   |
| (5) HDR through Homologous Recombination (HRR)                       | 4/66           | 0.0013           | 0.144        | Q99708<br>Q07864<br>P49959<br>P12004 | DNA endonuclease <i>RBBP8</i><br>DNA polymerase epsilon catalytic subunit <i>POLE</i><br>Double strand break repair protein <i>MRE11</i><br>Proliferating cell nuclear antigen <i>PCNA</i>              |
| (6) Erythrocytes take up oxygen and release carbon dioxide           | 2/8            | 0.0016           | 0.144        | P69905<br>P68871                     | Hemoglobin subunit alpha <i>HBA1</i><br>Hemoglobin subunit beta <i>HBB</i>                                                                                                                              |
| (7) PI3K/AKT activation                                              | 2/9            | 0.0020           | 0.144        | P35568<br>P27986                     | Insulin receptor substrate 1 <i>IRS1</i><br>Phosphatidylinositol 3-kinase regulatory subunit alpha <i>PIK3R1</i>                                                                                        |
| (8) RNA Polymerase III Transcription Initiation                      | 3/36           | 0.0023           | 0.144        | Q16533<br>Q5SXM2<br>A6H8Y1           | snRNA-activating protein complex subunit 1 <i>SNAPC1</i><br>snRNA-activating protein complex subunit 4 <i>SNAPC4</i><br>Transcription factor TFIIIB component B'' homolog <i>BDP1</i>                   |
| (9) HDR through MMEJ (alt-NHEJ)                                      | 2/10           | 0.0024           | 0.144        | Q99708<br>P49959                     | DNA endonuclease <i>RBBP8</i><br>Double strand break repair protein <i>MRE11</i>                                                                                                                        |
| (10) Signaling by MET                                                | 4/80           | 0.0027           | 0.144        | Q8N307<br>P27986<br>Q6VN20<br>Q96B97 | Mucin-20 <i>MUC20</i><br>Phosphatidylinositol 3-kinase regulatory subunit alpha <i>PIK3R1</i><br>Ran-binding protein 10 <i>RANBP10</i><br>SH3 domain-containing kinase-binding protein 1 <i>SH3KBP1</i> |

| Pathway name                                                   | Entities found | Entities p-value | Entities FDR | UniProt number                                                                                                                                                                                                                                         | Entities protein name                                                                                                                                                                                                                                                                                                                                                                                                                                                                                                                                                                                                                                                                                                                                                                                                                                                                                                                                                                                                                                                                                                                                                                                              |
|----------------------------------------------------------------|----------------|------------------|--------------|--------------------------------------------------------------------------------------------------------------------------------------------------------------------------------------------------------------------------------------------------------|--------------------------------------------------------------------------------------------------------------------------------------------------------------------------------------------------------------------------------------------------------------------------------------------------------------------------------------------------------------------------------------------------------------------------------------------------------------------------------------------------------------------------------------------------------------------------------------------------------------------------------------------------------------------------------------------------------------------------------------------------------------------------------------------------------------------------------------------------------------------------------------------------------------------------------------------------------------------------------------------------------------------------------------------------------------------------------------------------------------------------------------------------------------------------------------------------------------------|
| (11) Metabolism of proteins                                    | 25/2012        | 0.0028           | 0.144        | O95786<br>P07550<br>P04637<br>Q8IWV2<br>Q13618<br>Q13217<br>Q9Y297<br>P02671<br>Q92696<br>Q6ZVT0<br>P05019<br>P15088<br>Q8N307<br>P23511<br>Q9UBK2<br>Q14435<br>P12004<br>Q9Y6M0<br>P10599<br>Q9P031<br>Q5JRA6<br>Q13509<br>Q9Y4R7<br>O75347<br>Q9BTW9 | Antiviral innate immune response receptor RIG-I <i>DDX58</i><br>Beta-2 adrenergic receptor <i>ADRB2</i><br>Cellular tumour antigen <i>p53</i><br>Contactin-4 <i>CNTN4</i><br>Cullin-3 <i>CUL3</i><br>DnaJ homolog subfamily C member 3 <i>DNAJC3</i><br>F-box/WD repeat-containing protein 1A <i>BTRC</i><br>Fibrinogen alpha chain <i>FGA</i><br>Geranylgeranyl transferase type-2 subunit alpha <i>RABGGATA</i><br>Inactive polyglycyclase <i>TTLL10</i><br>Insulin-like growth factor I <i>IGF1</i><br>Mast cell carboxypeptidase A <i>CPA3</i><br>Mucin-20 <i>MUC20</i><br>Nuclear transcription factor Y subunit alpha <i>NFYA</i><br>Peroxisome proliferator-activated receptor gamma coactivator 1-alpha <i>PPARGC1A</i><br>Polypeptide N-acetylgalactosaminyltransferase 3 <i>GLNT3</i><br>Proliferating cell nuclear antigen <i>PCNA</i><br>Testisin <i>PRSS21</i><br>Thioredoxin <i>THIO</i><br>Thyroid transcription factor 1-associated protein 26 <i>CCDC59</i><br>Transport and Golgi organization protein 1 homolog <i>MIA3</i><br>Tubulin beta-3 chain <i>TUBB3</i><br>Tubulin monoglycyclase <i>TTLL3</i><br>Tubulin-specific chaperone A <i>TBCA</i><br>Tubulin-specific chaperone D <i>TBCD</i> |
| (12) RNA Polymerase III Abortive and Retractive Initiation     | 3/41           | 0.0033           | 0.144        | Q16533<br>Q5SXM2<br>A6H8Y1                                                                                                                                                                                                                             | snRNA-activating protein complex subunit 1 <i>SNAPC1</i><br>snRNA-activating protein complex subunit 4 <i>SNAPC4</i><br>Transcription factor TFIIIB component B'' homolog <i>BDP1</i>                                                                                                                                                                                                                                                                                                                                                                                                                                                                                                                                                                                                                                                                                                                                                                                                                                                                                                                                                                                                                              |
| (13) RNA Polymerase III Transcription                          | 3/41           | 0.0033           | 0.144        | Q16533<br>Q5SXM2<br>A6H8Y1                                                                                                                                                                                                                             | snRNA-activating protein complex subunit 1 <i>SNAPC1</i><br>snRNA-activating protein complex subunit 4 <i>SNAPC4</i><br>Transcription factor TFIIIB component B'' homolog <i>BDP1</i>                                                                                                                                                                                                                                                                                                                                                                                                                                                                                                                                                                                                                                                                                                                                                                                                                                                                                                                                                                                                                              |
| (14) Erythropoietin activates Phosphoinositide-3-kinase (PI3K) | 2/12           | 0.0034           | 0.144        | P27986<br>P48736                                                                                                                                                                                                                                       | Phosphatidylinositol 3-kinase regulatory subunit alpha <i>PIK3R1</i><br>Thyroid transcription factor 1-associated protein 26 <i>CCDC59</i>                                                                                                                                                                                                                                                                                                                                                                                                                                                                                                                                                                                                                                                                                                                                                                                                                                                                                                                                                                                                                                                                         |

| Pathway name                                                                                                                              | Entities found | Entities p-value | Entities FDR | UniProt number                                                               | Entities protein name                                                                                                                                                                                                                                                                                                                                             |
|-------------------------------------------------------------------------------------------------------------------------------------------|----------------|------------------|--------------|------------------------------------------------------------------------------|-------------------------------------------------------------------------------------------------------------------------------------------------------------------------------------------------------------------------------------------------------------------------------------------------------------------------------------------------------------------|
| (15) MET activates RAS signaling                                                                                                          | 2/12           | 0.0034           | 0.144        | Q8N307<br>Q6VN20                                                             | Mucin-20 <i>MUC20</i><br>Ran-binding protein 10 <i>RANBP10</i>                                                                                                                                                                                                                                                                                                    |
| (16) Erythrocytes take up carbon dioxide and release oxygen                                                                               | 2/12           | 0.0034           | 0.144        | P69905<br>P68871                                                             | Hemoglobin subunit alpha <i>HBA1</i><br>Hemoglobin subunit beta <i>HBB</i>                                                                                                                                                                                                                                                                                        |
| (17) O <sub>2</sub> /CO <sub>2</sub> exchange in erythrocytes                                                                             | 2/12           | 0.0034           | 0.144        | P69905<br>P68871                                                             | Hemoglobin subunit alpha <i>HBA1</i><br>Hemoglobin subunit beta <i>HBB</i>                                                                                                                                                                                                                                                                                        |
| (18) Carboxyterminal post-translational modifications of tubulin                                                                          | 3/43           | 0.0037           | 0.145        | Q6ZVT0<br>Q13509<br>Q9Y4R7                                                   | Inactive polyglycyclase <i>TTL10</i><br>Tubulin beta-3 chain <i>TUBB3</i><br>Tubulin monoglycyclase <i>TTL3</i>                                                                                                                                                                                                                                                   |
| (19) DNA Double-Strand Break Repair                                                                                                       | 5/148          | 0.0043           | 0.146        | P04637<br>Q99708<br>Q07864<br>P49959<br>P12004                               | Cellular tumour antigen <i>p53</i><br>DNA endonuclease <i>RBBP8</i><br>DNA polymerase epsilon catalytic subunit <i>POLE</i><br>Double strand break repair protein <i>MRE11</i><br>Proliferating cell nuclear antigen <i>PCNA</i>                                                                                                                                  |
| (20) TP53 regulates transcription of several additional cell death genes whose specific roles in p53-dependent apoptosis remain uncertain | 2/14           | 0.0046           | 0.146        | P04637<br>Q92696                                                             | Cellular tumour antigen <i>p53</i><br>Geranylgeranyl transferase type-2 subunit alpha <i>RABGGATA</i>                                                                                                                                                                                                                                                             |
| (21) SEMA3A-Plexin repulsion signaling by inhibiting Integrin adhesion                                                                    | 2/14           | 0.0046           | 0.146        | O75051<br>Q14563                                                             | Plexin-A2 <i>PLXNA2</i><br>Semaphorin-3A <i>SEMA3</i>                                                                                                                                                                                                                                                                                                             |
| (22) Transcriptional Regulation by TP53                                                                                                   | 8/367          | 0.0047           | 0.146        | P04637<br>P50750<br>P14854<br>Q99708<br>P49959<br>Q92696<br>P12004<br>P10599 | Cellular tumour antigen <i>p53</i><br>Cyclin-dependent kinase 9 <i>CDK9</i><br>Cytochrome c oxidase subunit 6B1 <i>COX6B1</i><br>DNA endonuclease <i>RBBP8</i><br>Double strand break repair protein <i>MRE11</i><br>Geranylgeranyl transferase type-2 subunit alpha <i>RABGGATA</i><br>Proliferating cell nuclear antigen <i>PCNA</i><br>Thioredoxin <i>THIO</i> |
| (23) Toll-like Receptor Cascades                                                                                                          | 5/156          | 0.0053           | 0.146        | Q9Y297<br>P02671<br>Q9NWZ3<br>Q13233<br>Q9BT09                               | F-box/WD repeat-containing protein 1A <i>BTRC</i><br>Fibrinogen alpha chain <i>FGA</i><br>Interleukin-1 receptor-associated kinase 4 <i>IRAK4</i><br>Mitogen-activated protein kinase kinase kinase 1 <i>MAP3K1</i><br>Protein canopy homolog 3 <i>CNPY3</i>                                                                                                      |

| Pathway name                   | Entities found | Entities p-value | Entities FDR | UniProt number             | Entities protein name                                                                                                                                                                                                 |
|--------------------------------|----------------|------------------|--------------|----------------------------|-----------------------------------------------------------------------------------------------------------------------------------------------------------------------------------------------------------------------|
| (24) Signaling by EGFR         | 3/51           | 0.0060           | 0.146        | O43184<br>P27986<br>Q96B97 | Disintegrin and metalloproteinase domain-containing protein 12 <i>ADAM12</i><br>Phosphatidylinositol 3-kinase regulatory subunit alpha <i>PIK3R1</i><br>SH3 domain-containing kinase-binding protein 1 <i>SH3KBP1</i> |
| (25) CRMPs in Sema3A signaling | 2/16           | 0.0060           | 0.146        | O75051<br>Q14563           | Plexin-A2 <i>PLXNA2</i><br>Semaphorin-3A <i>SEMA3</i>                                                                                                                                                                 |



**Table C – Reactome analysis of the AAE6 and EPE6 overlapping interactors selected with the Protein-Pathway method**

| Pathway name                                                                   | Entities found | Entities p-value | Entities FDR | UniProt number                       | Entities protein name                                                                                                                                                  |
|--------------------------------------------------------------------------------|----------------|------------------|--------------|--------------------------------------|------------------------------------------------------------------------------------------------------------------------------------------------------------------------|
| (1) TP53 Regulates Metabolic Genes                                             | 3/88           | 0.0005           | 0.094        | P04637<br>P14854<br>P10599           | Cellular tumour antigen <i>P53</i><br>Cytochrome c oxidase subunit 6B1 <i>CX6B1</i><br>Thioredoxin <i>THIO</i>                                                         |
| (2) Late endosomal microautophagy                                              | 2/34           | 0.0016           | 0.094        | Q9H444<br>P68871                     | Charged multivesicular body protein 4b <i>CHMP4B</i><br>Hemoglobin subunit beta <i>HBB</i>                                                                             |
| (3) Carboxyterminal post-translational modifications of tubulin                | 2/43           | 0.0026           | 0.094        | Q6ZVT0<br>Q9Y4R7                     | Inactive polyglycylase <i>TTL10</i><br>Tubulin monoglycylase <i>TTL3</i>                                                                                               |
| (4) Regulation of TP53 Expression                                              | 1/2            | 0.0035           | 0.094        | P04637                               | Cellular tumour antigen <i>P53</i>                                                                                                                                     |
| (5) FOXO-mediated transcription                                                | 2/66           | 0.0059           | 0.094        | P23511<br>P10599                     | Nuclear transcription factor Y subunit alpha <i>NFYA</i><br>Thioredoxin <i>THIO</i>                                                                                    |
| (6) Transcriptional activation of cell cycle inhibitor p21                     | 1/4            | 0.0070           | 0.094        | P04637                               | Cellular tumour antigen <i>P53</i>                                                                                                                                     |
| (7) Transcriptional activation of p53 responsive genes                         | 1/4            | 0.0070           | 0.094        | P04637                               | Cellular tumour antigen <i>P53</i>                                                                                                                                     |
| (8) Negative regulation of TCF-dependent signaling by DVL-interacting proteins | 1/5            | 0.0087           | 0.094        | O14641                               | Segment polarity protein dishevelled homolog <i>DVL2</i>                                                                                                               |
| (9) Reelin signalling pathway                                                  | 1/5            | 0.0087           | 0.094        | Q96B97                               | SH3 domain-containing kinase-binding protein 1 <i>SH3KBP1</i>                                                                                                          |
| (10) Activation of NOXA and translocation to mitochondria                      | 1/5            | 0.0087           | 0.094        | P04637                               | Cellular tumour antigen <i>P53</i>                                                                                                                                     |
| (11) Protein repair                                                            | 1/6            | 0.0105           | 0.094        | P10599                               | Thioredoxin <i>THIO</i>                                                                                                                                                |
| (12) Oxidative Stress Induced Senescence                                       | 2/94           | 0.0117           | 0.094        | P04637<br>P10599                     | Cellular tumour antigen <i>P53</i><br>Thioredoxin <i>THIO</i>                                                                                                          |
| (13) RUNX3 regulates CDKN1A transcription                                      | 1/7            | 0.0122           | 0.094        | P04637                               | Cellular tumour antigen <i>P53</i>                                                                                                                                     |
| (14) Cell Cycle, Mitotic                                                       | 4/536          | 0.0129           | 0.094        | P04637<br>Q13352<br>Q9H444<br>Q96GY3 | Cellular tumour antigen <i>P53</i><br>Centromere protein R <i>CENPR</i><br>Charged multivesicular body protein 4b <i>CHMP4B</i><br>Protein lin-37 homolog <i>LIN37</i> |
| (15) WNT mediated activation of DVL                                            | 1/8            | 0.0139           | 0.094        | O14641                               | Segment polarity protein dishevelled homolog <i>DVL2</i>                                                                                                               |

| Pathway name                                                         | Entities found | Entities p-value | Entities FDR | UniProt number                                                               | Entities protein name                                                                                                                                                                                                                                                                |
|----------------------------------------------------------------------|----------------|------------------|--------------|------------------------------------------------------------------------------|--------------------------------------------------------------------------------------------------------------------------------------------------------------------------------------------------------------------------------------------------------------------------------------|
| (16) Erythrocytes take up oxygen and release carbon dioxide          | 1/8            | 0.0139           | 0.094        | P68871                                                                       | Hemoglobin subunit beta <i>HBB</i>                                                                                                                                                                                                                                                   |
| (17) Cargo recognition for clathrin-mediated endocytosis             | 2/105          | 0.0145           | 0.094        | O14641<br>Q96B97                                                             | Segment polarity protein dishevelled homolog DVL2<br>SH3 domain-containing kinase-binding protein 1 SH3KBP1                                                                                                                                                                          |
| (18) Activation of PUMA and translocation to mitochondria            | 1/9            | 0.0157           | 0.094        | P04637                                                                       | Cellular tumour antigen <i>P53</i>                                                                                                                                                                                                                                                   |
| (19) PI5P Regulates TP53 Acetylation                                 | 1/9            | 0.0157           | 0.094        | P04637                                                                       | Cellular tumour antigen <i>P53</i>                                                                                                                                                                                                                                                   |
| (20) Metabolism of proteins                                          | 8/2012         | 0.0158           | 0.094        | P04637<br>P02671<br>Q6ZVT0<br>P23511<br>Q9Y6M0<br>P10599<br>Q9P031<br>Q9Y4R7 | Cellular tumour antigen P53<br>Fibrinogen alpha chain FGA<br>Inactive polyglycylase TTLL10<br>Nuclear transcription factor Y subunit alpha NFYA<br>Testisin PRSS21<br>Thioredoxin THIO<br>Thyroid transcription factor 1-associated protein 26 CCDC59<br>Tubulin monoglycylase TTLL3 |
| (21) ATF6 (ATF6-alpha) activates chaperone genes                     | 1/10           | 0.0174           | 0.094        | P23511                                                                       | Nuclear transcription factor Y subunit alpha <i>NFYA</i>                                                                                                                                                                                                                             |
| (22) Regulation of FOXO transcriptional activity by acetylation      | 1/10           | 0.0174           | 0.094        | P10599                                                                       | Thioredoxin <i>THIO</i>                                                                                                                                                                                                                                                              |
| (23) TP53 Regulates Transcription of Death Receptors and Ligands     | 1/12           | 0.0209           | 0.094        | P04637                                                                       | Cellular tumour antigen <i>P53</i>                                                                                                                                                                                                                                                   |
| (24) TP53 Regulates Transcription of Caspase Activators and Caspases | 1/12           | 0.0209           | 0.094        | P04637                                                                       | Cellular tumour antigen <i>P53</i>                                                                                                                                                                                                                                                   |
| (25) WNT5:FZD7-mediated leishmania damping                           | 1/12           | 0.0209           | 0.094        | O14641                                                                       | Segment polarity protein dishevelled homolog <i>DVL2</i>                                                                                                                                                                                                                             |
